# Supplementary material
Source: PubMed Central journal article supplement (PMC2717780)
Supplement: fj.09-129908_1.pdf [file fj.09-129908_1.pdf]

## **Supplemental Information**

### **Crystal structure of isoflurane bound to integrin LFA-1 supports a unified mechanism of volatile anesthetic action in the immune and central nervous systems**

Hongmin Zhang, Nathan S. Astrof, Jin-Huan Liu, Jia-huai Wang, Motomu Shimaoka

- **Supplemental Figure 1**
- **Supplemental Table 1**

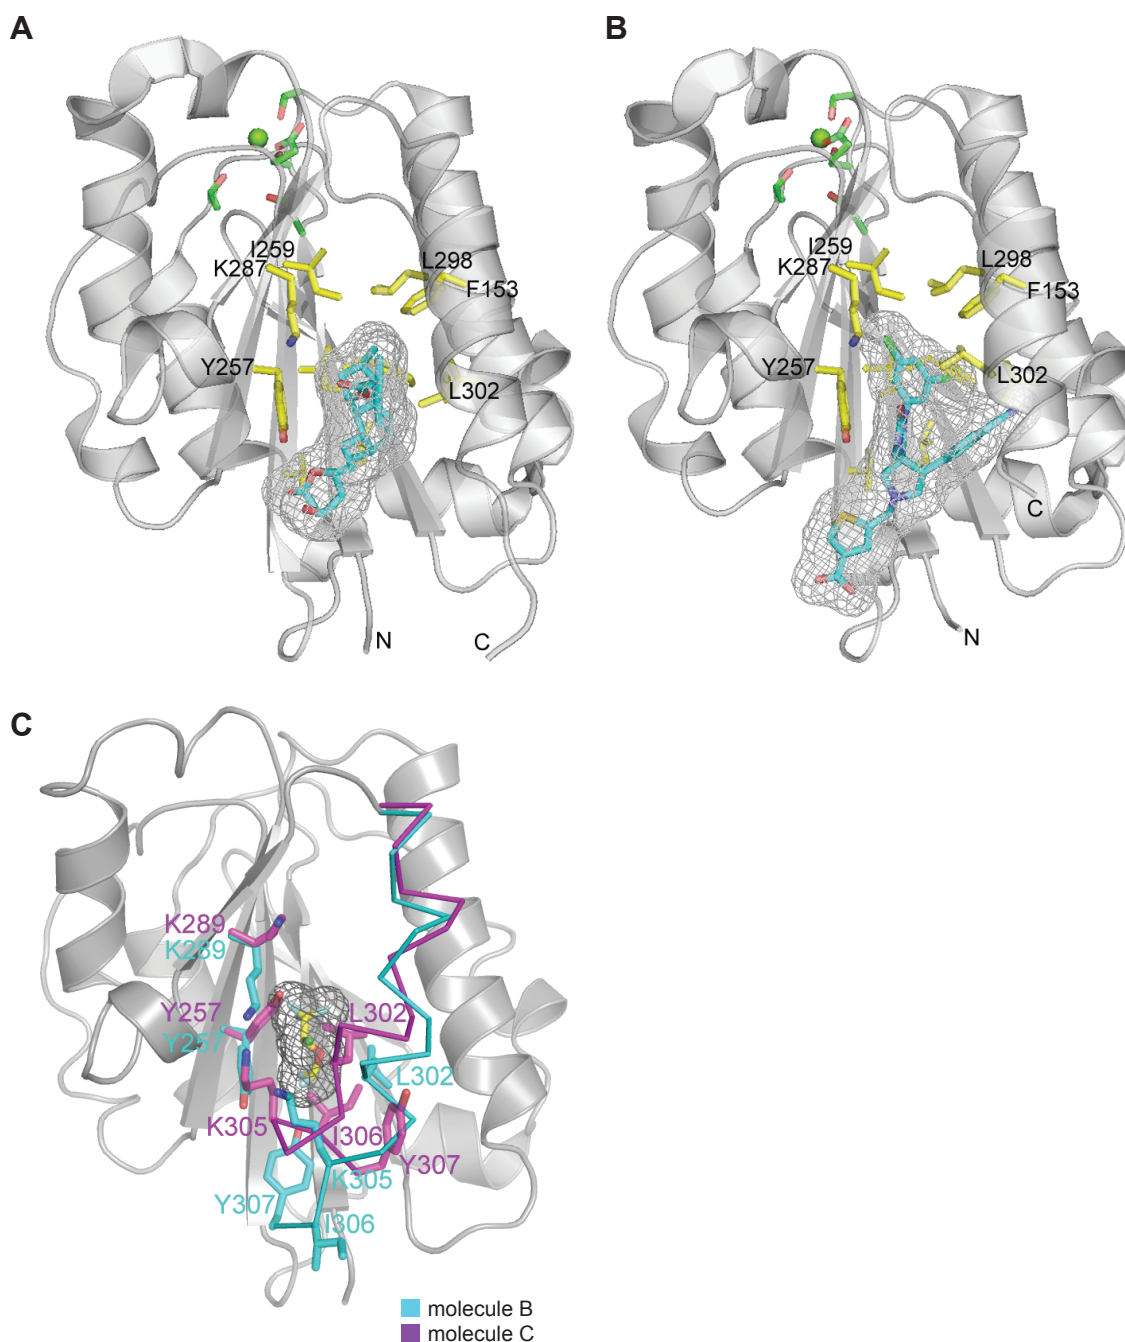

**Figure S1.** Interactions with I domain by LFA-1 antagonists or isoflurane. **(A&B)** Ribbon diagram display of the I domain in complex with the inhibitor lovastatin **(A)**, PDB code 1CQP) and the spirocyclic hydantoin-based compound 8 **(B)**, PDB code 2ICA). The side-chains of the antagonist-interacting (yellow) and the MIDAS (green) residues are shown as a stick model with red oxygen and blue nitrogen atoms. The Mg<sup>2+</sup> ions at the MIDAS are depicted as green spheres. Lovastatin and compound 8 are shown as a stick model with cyan carbon, red oxygen, yellow sulfur, and blue nitrogen, and green chloride atoms. A mesh representation of Van der Waals surface is shown for the antagonists. **(C)** A crystal lattice contact-induced distortion of the C-terminal  $\alpha 7$  helix in molecule C excluding isoflurane binding. The superposition of molecules B and C is shown by a gray ribbon diagram except for the C-terminal helix which is shown with cyan (molecule B) and magenta (molecule C) sticks. The side-chains, whose orientations substantially differ in molecules B and C, are shown as a stick model with the same colors as the corresponding  $\alpha 7$  helix and red oxygen and blue nitrogen atoms, labeled accordingly. Bound isoflurane in molecules B is depicted as a stick model with carbon (yellow), oxygen (red), chloride (green), and fluorine (sky blue) atoms color-coded. A mesh representation of Van der Waals surface for the bound isoflurane is shown.

**Table S1: Data reduction and refinement statistics**

| PDB code                                      | 3F74<br>(- isoflurane) | 3F78<br>(+ isoflurane) |
|-----------------------------------------------|------------------------|------------------------|
| Space group                                   | P2 <sub>1</sub>        | P2 <sub>1</sub>        |
| a (Å)                                         | 61.8                   | 62.7                   |
| b (Å)                                         | 85.6                   | 85.87                  |
| c (Å)                                         | 63.6                   | 63.97                  |
| β (°)                                         | 117.93                 | 118.18                 |
| Molecule/asymmetric unit                      | 3                      | 3                      |
| Wavelength (Å)                                | 0.97931                | 0.97931                |
| Resolution (Å)                                | 20-1.70                | 20-1.60                |
| Unique reflections                            | 64731                  | 76838                  |
| Completeness (%)                              | 99.9 (99.8)            | 97.9 (90.4)            |
| R <sub>sym</sub> <sup>a</sup> (%)             | 7.0 (57.3)             | 6.5 (61.6)             |
| I/σ (I)                                       | 18.9 (2.1)             | 22.2 (1.7)             |
| Redundancy                                    | 3.9 (3.7)              | 4.4 (3.3)              |
| Reflections (work/test)                       | 61381/3280             | 72906/3872             |
| R <sup>b</sup> /R <sub>free</sub> (%)         | 14.58/17.79            | 15.28/18.08            |
| Ramachandran plot (favored/allowed/outlier %) | 97.2/2.8/0             | 96.8/3.2/0             |
| Protein/water atoms                           | 4426/708               | 4458/644               |
| Average B-factor (Å <sup>2</sup> )            | 14.8                   | 22.8 <sup>c</sup>      |
| R.m.s.d. from ideal values                    |                        |                        |
| Bond lengths (Å)                              | 0.009                  | 0.008                  |
| Bond angles (°)                               | 1.202                  | 1.187                  |

Numbers in parentheses are for the highest resolution shell

<sup>a</sup>R<sub>sym</sub> =  $\sum_{hkl} |I - \langle I \rangle| / \sum I$ , where I is the observed intensity and  $\langle I \rangle$  is the average intensity from observations of symmetry-related reflections. A subset of the data (5%) was excluded from the refinement and used to calculate R<sub>free</sub>.

<sup>b</sup>R =  $\sum ||F_o| - |F_c|| / \sum |F_o|$ .

<sup>c</sup>the average B-factor for molecules A, B, and C; the value for only the isoflurane-bound structures (i.e., molecule A and B) is 20.8 Å<sup>2</sup>
